# Supplementary material for: T3E: a tool for characterising the epigenetic profile of transposable elements using ChIP-seq data
Source: PubMed Central journal article supplement (PMC9710123; doi:10.1186/s13100-022-00285-z), 2022-11-30
Supplement: 13100_2022_285_MOESM1_ESM.pdf [file 13100_2022_285_MOESM1_ESM.pdf]

# **T3E: a tool for characterising the epigenetic profile of transposable elements using ChIP-seq data**

Michelle Almeida da Paz and Leila Taher

Institute of Biomedical Informatics, TU Graz, Austria

## **SUPPLEMENTARY MATERIALS**

| Dataset | Sample    | Target    | File accession | Laboratory/Reference         | Read length (bp) | Library size | Input control            |             |
|---------|-----------|-----------|----------------|------------------------------|------------------|--------------|--------------------------|-------------|
| 1       | B-cell    | NA        | ENCFF000AMM    | Bradley Bernstein (Broad)    | 35               | 43569325     | -                        |             |
|         |           |           | ENCFF001HAY    |                              |                  | 26979122     |                          |             |
|         |           | H3K4me3   | ENCFF001EUE    | John Stamatoyannopoulos (UW) | 36               | 20123133     | ENCFF001HAY              |             |
|         | HepG2     | NA        | ENCFF272WBE    | Richard Myers (HAIB)         | 50               | 25554473     | -                        |             |
|         |           |           | ENCFF380HNN    |                              | 100              | 26535355     |                          |             |
|         |           |           | ENCFF302HDW    |                              | 75               | 69681898     |                          |             |
|         |           |           | FOXP1          |                              | ENCFF734HBO      | 75           |                          | 18701212    |
|         | IMR-90    | NA        | ENCFF679UAT    | Bing Ren (UCSD)              | 36               | 47554621     | -                        |             |
|         |           |           | ENCFF421HCG    |                              | 10800072         |              |                          |             |
|         |           | H3K79me1  | ENCFF682GXA    |                              | 35               | 14050435     | ENCFF679UAT, ENCFF421HCG |             |
| 2       | 14.5 DCW  | NA        | SRR15671382    | [27,28]                      | 35               | 14251048     | -                        |             |
|         |           | p300      | SRR15671381    |                              | 36               | 17878738     | SRR15671382              |             |
| 3       | GM12878   | NA        | GM12878_input  | [20]                         | 27               | 8625420      | -                        |             |
|         |           | POL II    | GM12878_pol2   |                              | 35               | 15253593     | GM12878_input            |             |
|         |           | POL II S2 | GM12878_pol2s2 |                              | 36               | 32757721     |                          |             |
|         |           | POL III   | GM12878_pol3   |                              | 26               | 6013730      | -                        |             |
|         |           | Hela      | NA             |                              | Hela_input1      | 33           | 6133195                  | -           |
|         | POL II    |           | Hela_pol2      |                              | 4208492          |              | Hela_input1              |             |
|         | NA        |           | Hela_input2    |                              | 35               |              | 24747965                 | -           |
|         | POL II S2 |           | Hela_pol2s2    |                              |                  |              | 20297183                 | Hela_input2 |
|         | POL III   |           | Hela_pol3      |                              |                  |              | 12763612                 | -           |
|         | HUVEC     | NA        | Huvec_input    |                              | 35               | 49566996     | -                        |             |
|         |           | POL II    | Huvec_pol2     |                              | 36               | 33228426     | Huvec_input              |             |
|         | K562      | NA        | K562_input     |                              | 35               | 17964555     | -                        |             |
|         |           | POL II    | K562_pol2      |                              |                  | 26961880     | K562_input               |             |
|         |           | H3K9me1   | K562_H3k9me1   |                              |                  | 24171879     |                          |             |
|         |           | H3K27ac   | K562_H3k27ac   |                              |                  | 14597481     |                          |             |
|         |           | H3K79me2  | K562_H3k79me2  |                              |                  | 37282045     |                          |             |
|         |           | H3K36me3  | K562_H3k36me3  |                              |                  | 34           |                          | 9308987     |
|         |           | H3K9me3   | K562_H3k9me3   |                              |                  | 36           | 37197946                 |             |
|         |           | H3K4me1   | K562_H3k4me1   |                              |                  | 38           | 12356771                 |             |
|         |           | H3K4me2   | K562_H3k4me2   |                              |                  |              | 8856317                  |             |
|         |           | H3K27me3  | K562_H3k27me3  |                              |                  | 41           | 18342667                 |             |
|         |           | H3K4me3   | K562_H3k4me3   |                              |                  |              | 19173297                 |             |
|         |           | H3K9ac    | K562_H3k9ac    |                              |                  | 47           | 13785094                 |             |
|         |           | PBDE      | NA             |                              |                  | Pbde_input   | 36                       | 55388830    |
|         | POL II    |           | Pbde_pol2      |                              | 26082143         | Pbde_input   |                          |             |

**Supplementary Table S1. Description of ChIP-seq datasets.** Three datasets containing ChIP-seq experiments are detailed. Sample column refers to the cell type (cell line or primary cell). Input controls present no antibody targets (NA). Active chromatin histone marks (H3K27ac, H3K4me2, H3K9ac, H3K4me3, H3K79me1, H3K79me2, H3K4me1 and H3K36me3), repressive chromatin histone marks (H3K9me1, H3K9me3 and H3K27me3), transcription factor FOXP1, transcriptional co-activator p300, RNA Polymerases II, II S2 and III are targets used in ChIP-seq experiments. Entire names for file accessions are better described in Supplementary Table S2 for Dataset 3. Laboratory/Reference column refers to the research group that produced the ChIP-seq experiments or reference paper where the results were published. Read length in base pairs (bp) is calculated as the average of 10,000 reads of the library. Library sizes refer to the number of reads in the ChIP-seq library. In the input control column, hyphen represents input controls and ChIP-seq samples have their corresponding input control

file accession listed. The sample ENCFF682GXA has two corresponding input controls (ENCFF679UAT – “good control” and ENCFF421HCG – “bad control”).

| Sample    | File accession | Name accession                                                                                   |
|-----------|----------------|--------------------------------------------------------------------------------------------------|
| GM12878   | GM12878_input  | wgEncodeSydhTfbsGm12878IggmusRawDataRep1<br>wgEncodeSydhTfbsGm12878IggmusRawDataRep2             |
|           | GM12878_pol2   | wgEncodeOpenChromChipGm12878Pol2RawDataRep2                                                      |
|           | GM12878_pol2s2 | wgEncodeSydhTfbsGm12878Pol2s2IggmusRawDataRep1<br>wgEncodeSydhTfbsGm12878Pol2s2IggmusRawDataRep2 |
|           | GM12878_pol3   | wgEncodeSydhTfbsGm12878Pol3RawDataRep1<br>wgEncodeSydhTfbsGm12878Pol3RawDataRep2                 |
| Hela      | Hela_input1    | wgEncodeOpenChromChipHelas3InputRawData                                                          |
|           | Hela_pol2      | wgEncodeOpenChromChipHelas3Pol2RawDataRep1                                                       |
|           | Hela_input2    | SRR036650<br>SRR036651<br>SRR036652<br>SRR036653<br>SRR036654                                    |
|           | Hela_pol2s2    | wgEncodeSydhTfbsHelas3Pol2s2IgggrabRawDataRep1                                                   |
|           | Hela_pol3      | SRR036655<br>SRR036657<br>SRR036658<br>SRR036659                                                 |
| HUVEC     | Huvec_input    | wgEncodeSydhTfbsHuvecInputUcdRawData                                                             |
|           | Huvec_pol2     | wgEncodeHaibTfbsHuvecPol2Pcr1xRawDataRep2                                                        |
| K562      | K562_input     | wgEncodeBroadHistoneK562ControlStdRawDataRep1                                                    |
|           | K562_pol2      | wgEncodeOpenChromChipK562Pol2RawDataRep1<br>wgEncodeOpenChromChipK562Pol2RawDataRep2             |
|           | K562_H3k9me1   | wgEncodeBroadHistoneK562H3k9me1StdRawDataRep1                                                    |
|           | K562_H3k27ac   | wgEncodeBroadHistoneK562H3k27acStdRawDataRep1<br>wgEncodeBroadHistoneK562H3k27acStdRawDataRep2   |
|           | K562_H3k79me2  | wgEncodeBroadHistoneK562H3k79me2StdRawDataRep1<br>wgEncodeBroadHistoneK562H3k79me2StdRawDataRep2 |
|           | K562_H3k36me3  | wgEncodeBroadHistoneK562H3k36me3StdRawDataRep1<br>wgEncodeBroadHistoneK562H3k36me3StdRawDataRep2 |
|           | K562_H3k9me3   | wgEncodeBroadHistoneK562H3k9me3StdRawDataRep2                                                    |
|           | K562_H3k4me1   | wgEncodeBroadHistoneK562H3k4me1StdRawDataRep1<br>wgEncodeBroadHistoneK562H3k4me1StdRawDataRep2   |
|           | K562_H3k4me2   | wgEncodeBroadHistoneK562H3k4me2StdRawDataRep1<br>wgEncodeBroadHistoneK562H3k4me2StdRawDataRep2   |
|           | K562_H3k27me3  | wgEncodeBroadHistoneK562H3k27me3StdRawDataRep1<br>wgEncodeBroadHistoneK562H3k27me3StdRawDataRep2 |
|           | K562_H3k4me3   | wgEncodeBroadHistoneK562H3k4me3StdRawDataRep1<br>wgEncodeBroadHistoneK562H3k4me3StdRawDataRep2   |
|           | K562_H3k9ac    | wgEncodeBroadHistoneK562H3k9acStdRawDataRep1                                                     |
|           | PBDE           | Pbde_input                                                                                       |
| Pbde_pol2 |                | wgEncodeSydhTfbsPbdePol2UcdRawDataRep2                                                           |

**Supplementary Table S2. File accession description of Dataset 3.** Entire names of CHIP-seq experiments are listed for each file accession. Files from the same file accession code are pooled together using SAMtools merge. Sample column refers to the different cell lines.

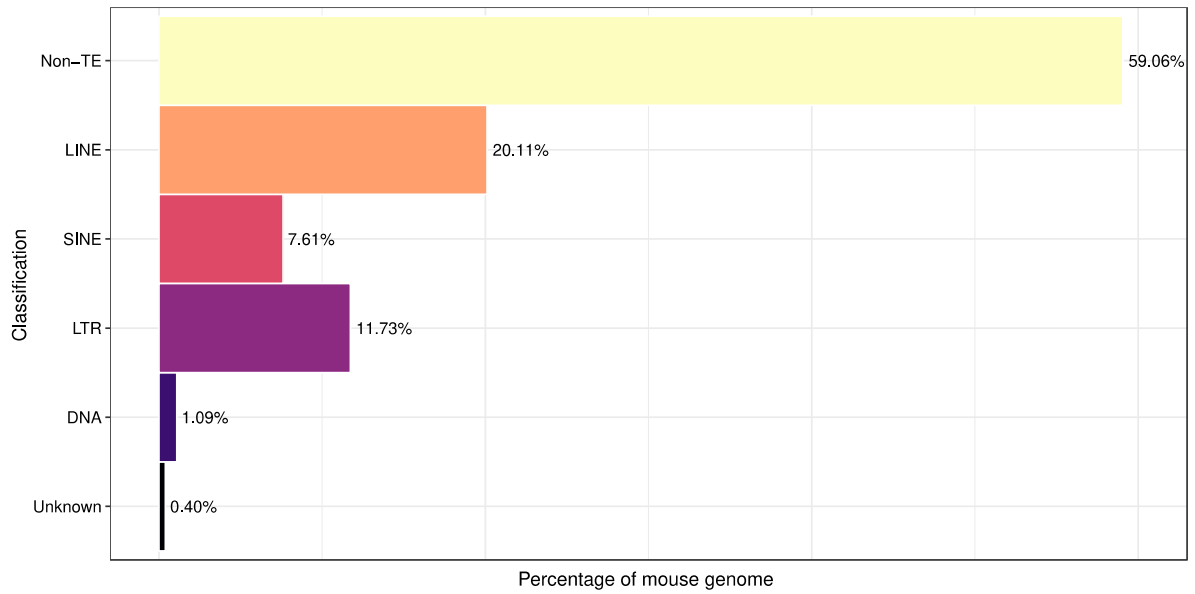

**Supplementary Figure S1. Nearly half of the mouse genome is comprised by TEs.** Percentage covered by TE classes and non TEs in the mouse genome. Colours represent different classifications of TEs (DNAs, LINEs, LTRs, SINEs) followed by their percentage in the mouse genome. TEs with unknown classification are registered as “Unknown”. The portion of the mouse genome not covered by TEs is indicated by “non-TE”.

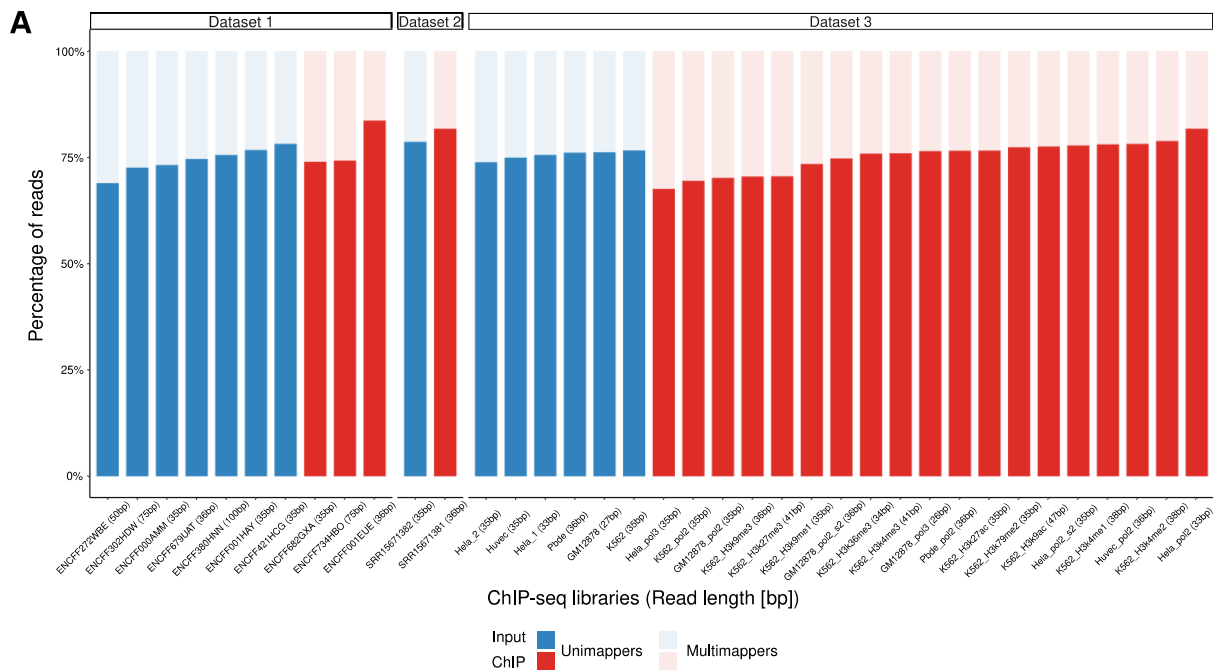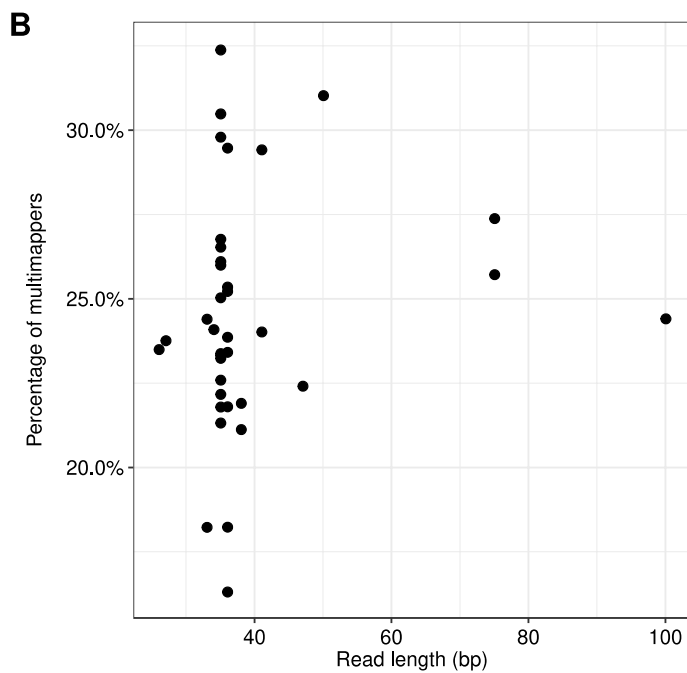

**Supplementary Figure S2.** Mapping statistics for all ChIP-seq experiments and their corresponding read lengths. (A) Fraction of uni- and multimappers for 37 ChIP-seq libraries (red) and their input controls (blue) (Datasets 1-3; Methods). Only small differences were found when comparing ChIP-seq input control experiments generated by the same laboratory (Richard Myers - HAIB) for the same cell type (HepG2) with 50 bp (ENCFF272WBE), 75 bp (ENCFF302HDW) and 100 bp (ENCFF380HNN), yielding 68.94%, 72.59% and 75.56% unimappers, respectively. (B) Read length alone does not explain

the differences observed in the percentage of yielded multimappers when comparing different ChIP-seq libraries within the range analysed here (26bp-100bp).

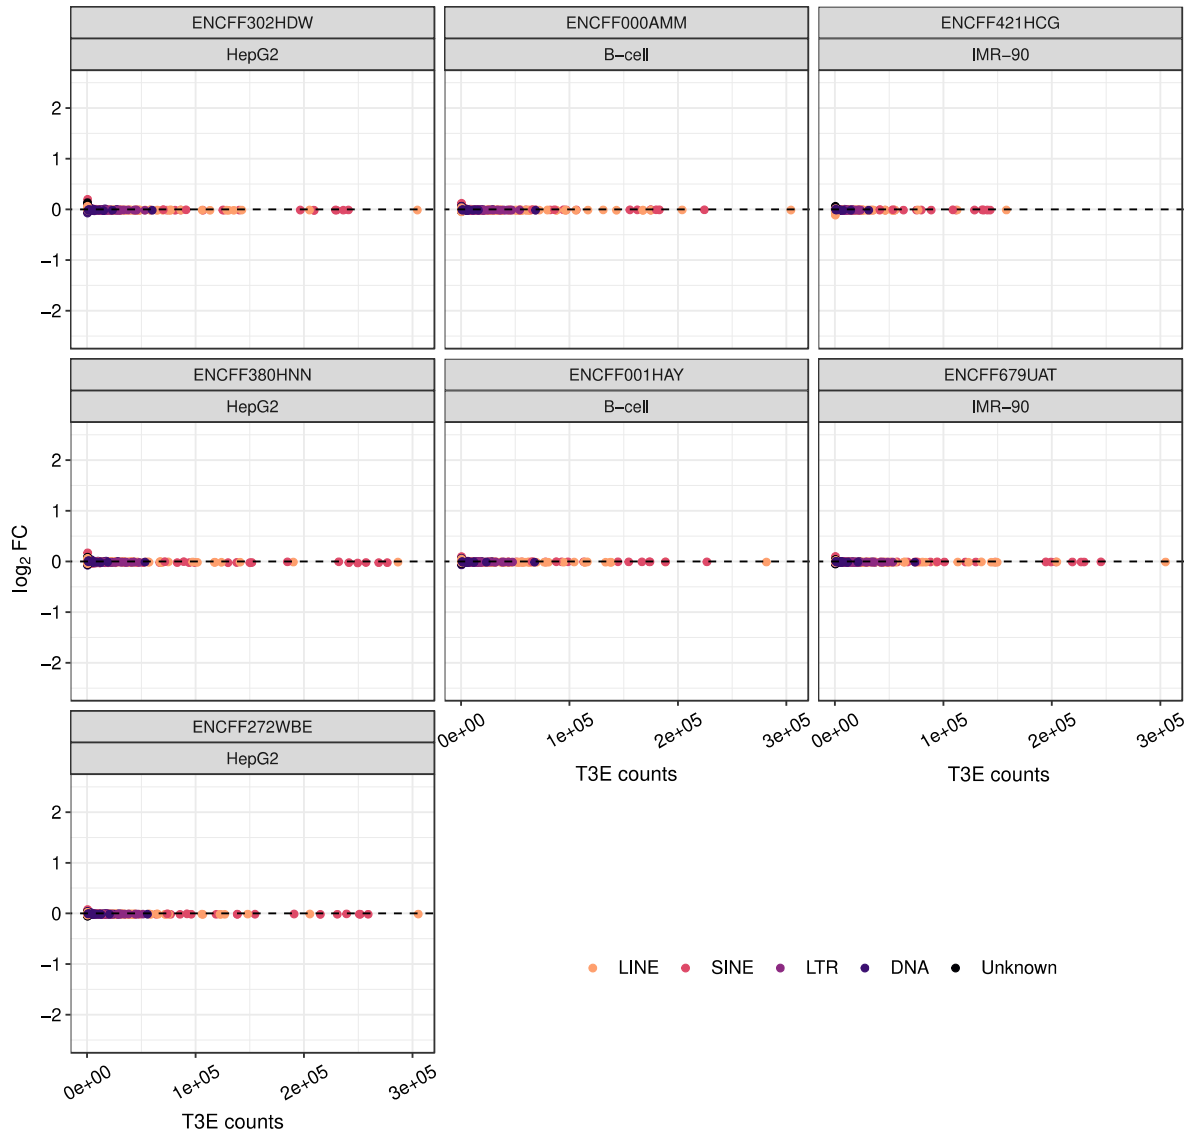

**Supplementary Figure S3. The expected number of read mappings estimated by T3E reflects the input control.** TE families/subfamilies are represented as dots and coloured according to their classification (i.e. DNA, LINE, LTR and SINE classes). TEs with unknown classification are registered as “Unknown”. Fold-Changes (FC) are calculated as the fraction among the average of read mapping counts from  $N = 100$  T3E simulations and the read mapping counts of the input control DNA.  $\log_2 FC$  is displayed on y-axis, while x-axis designates the average read mapping counts of T3E. Dashed line shows the ratio 1:1 of read mapping counts for T3E and input control. Seven ChIP-seq input control experiments from Dataset 1 are presented.



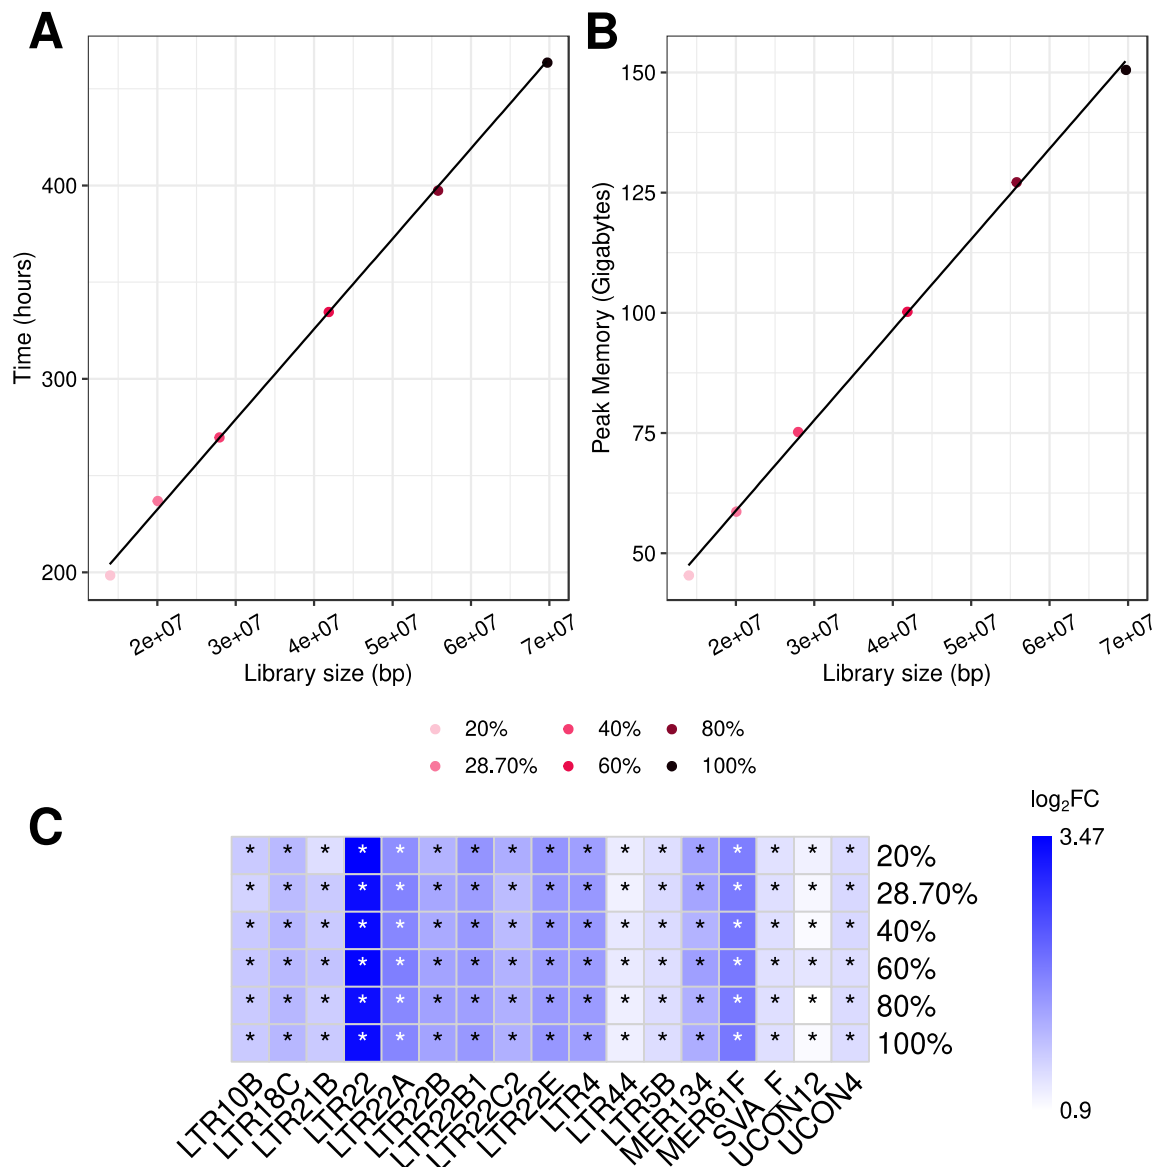

**Supplementary Figure S4. Down-sampling input control still produces good results with T3E.**

Input library size of approximately 70 million reads (100%) and down-sampled library sizes (with their respective percentages to the actual input library size) are represented by different colours. The results of input library size of 20 million reads (28.70%) are described in Results section. T3E algorithm shows approximately linear run-time **(A)** and memory complexities **(B)** with respect to the input library size. Library size is represented in base pairs (bp). **(C)** Only enriched TE families/subfamilies ( $FC > 2$  and  $P\text{-value} \leq 0.05$ ) of the HepG2 ChIP-seq sample are represented in the heatmap. Fold-changes are calculated as read mapping counts of the ChIP-seq sample divided by the average of read mapping counts of  $N = 100$  simulated input libraries. P-values  $\leq 0.05$  are indicated by asterisks. White asterisks indicate  $FC > 4$ . Blue colour intensity varies according to the  $\text{Log}_2FC$ . The UCON12 subfamily is slightly affected by down-sampling since it contains only 56 individual copies in the human genome.

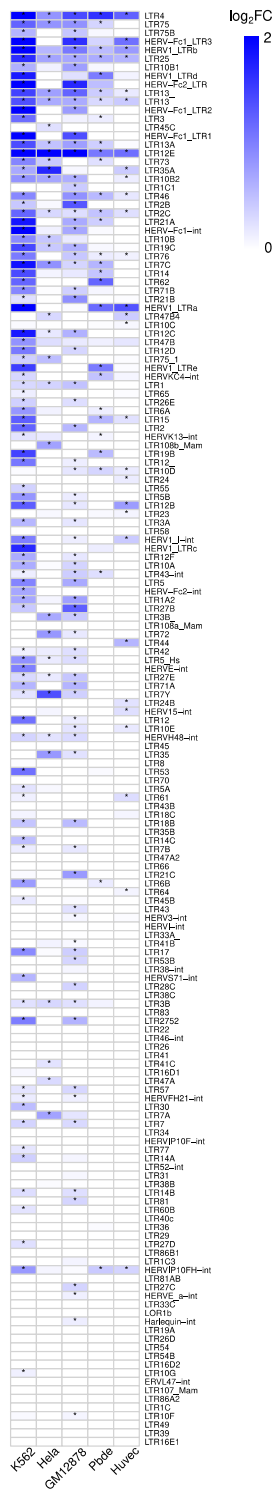

**Supplementary Figure S5. RNA Polymerase II enrichment to LTR retrotransposons in different cell lines.** Cancer (K562 and HeLa), transformed (GM12878) and normal (PBDE and HUVEC) cell lines are displaced in columns in the heatmap. Only TE families/subfamilies described by repEnrich [20] are represented in the heatmap. P-values  $\leq 0.05$  are indicated by asterisks. Fold-changes are calculated as read mapping counts of the ChIP-seq sample divided by the average of read mapping counts of  $N = 100$

simulated input libraries. Blue colour intensity varies according to the  $\text{Log}_2\text{FC}$  with a maximum of 2. White-coloured cells represent no signal.

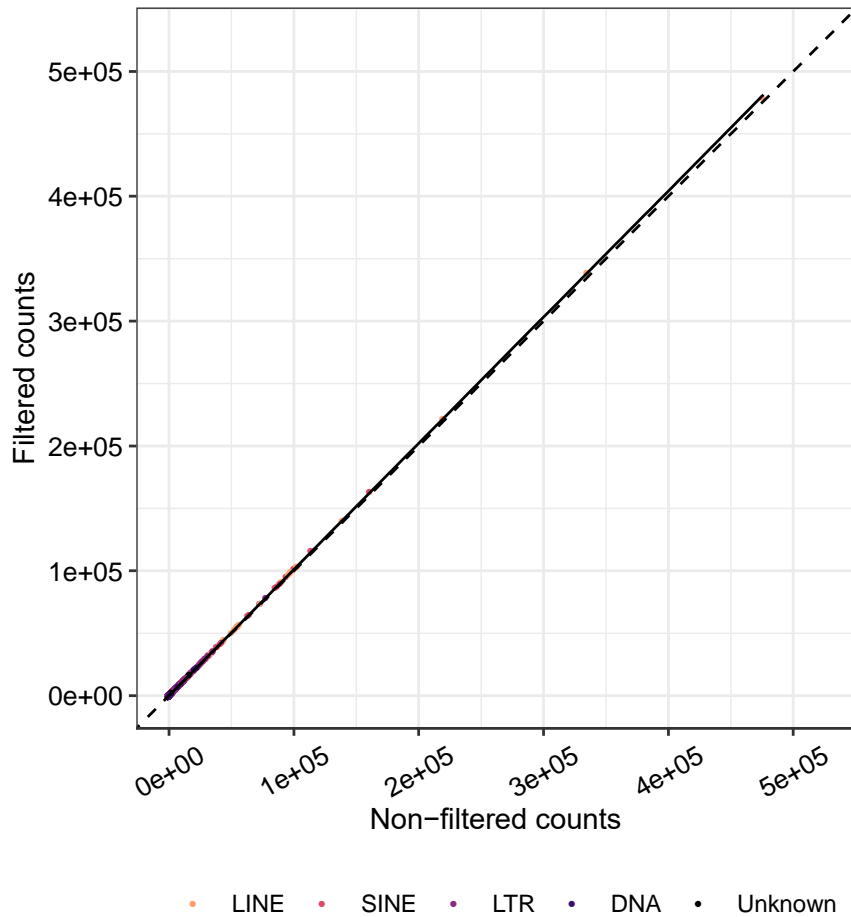

**Supplementary Figure S6. Removing artifact regions from Dataset 2 does not impact on read mapping counts.** Read mapping counts for each TE families/subfamilies calculated as the average of read mapping counts of  $N = 10$  simulated input libraries using T3E. A linear one-to-one relationship among the non-filtered (x-axis) and filtered (y-axis) is observed suggesting that rarely filtered out regions comprehend a portion of individual copies of TE families/subfamilies. To illustrate, the filter approach only filtered out 0.001% of the entire region covered by any individual copy of the L1Md\_F2 element, considered the TE with the highest number of read mapping counts and covering the highest number of nucleotides in the mouse genome. TE families/subfamilies are represented as dots and coloured according to their classification (i.e. DNA, LINE, LTR and SINE classes). TEs with unknown classification are registered as “Unknown”. Dashed line shows the diagonal and solid line indicates the fitted linear model.

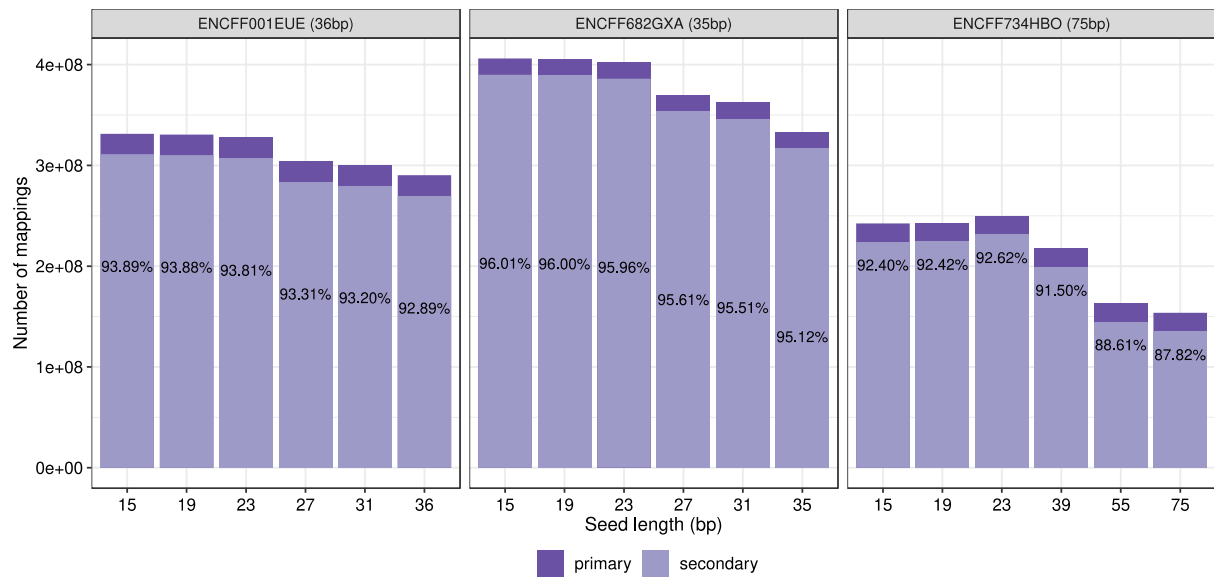

**Supplementary Figure S7. Number of primary and secondary read mappings depending on the seed length parameter of bwa mem (“-k”).** Mapping statistics obtained using the option “flagstat” of SAMtools. Six values were used for the parameter of bwa mem defining the minimum seed length (“-k”), starting from 15 and up to the actual read length of the ChIP-seq library. The default is “-k 19”. Increasing the minimum seed length from the default value “-k 19” reduces the number of secondary mappings and, overall, the sensitivity. Secondary mappings are indicated as percentages.

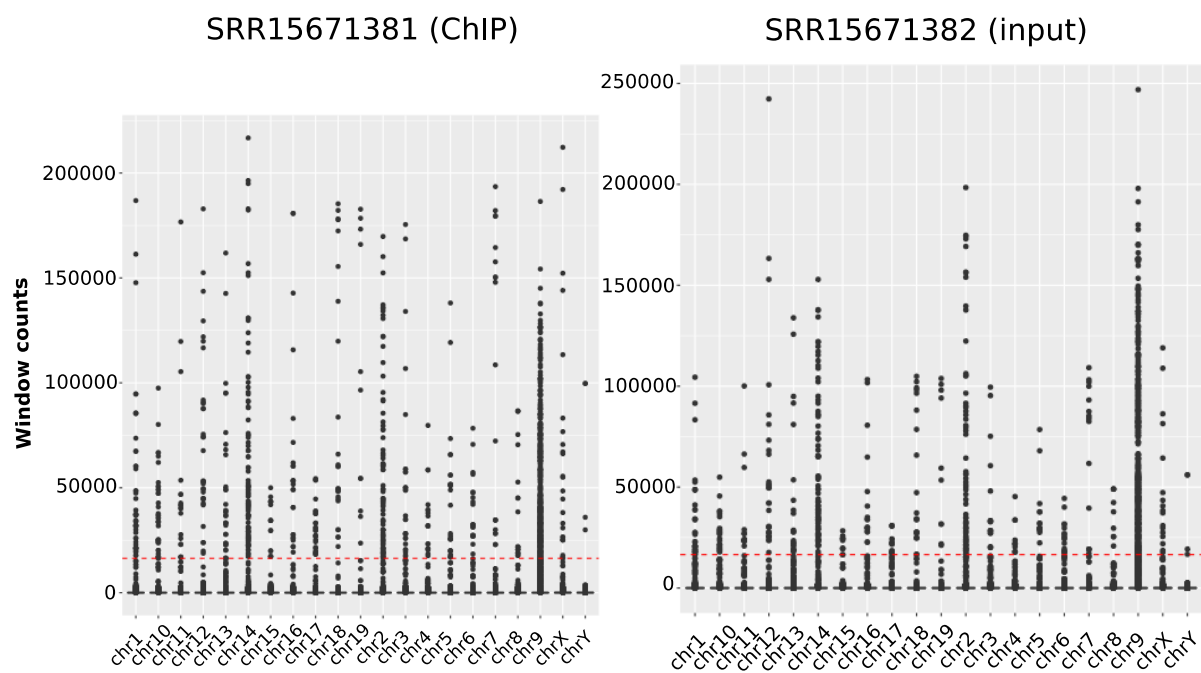

**Supplementary Figure S8. Window read mapping counts for ChIP-seq sample and input control of Dataset 2.** Sliding windows of size 100 bp were created scanning each chromosome of the mouse genome considering 50 bp of step. Dashed red line represent the threshold of 99.997<sup>th</sup> percentile considering both chromosome and genome.
